# Supplementary material
Source: PubMed Central journal article supplement (PMC5800333)
Supplement: jnnp-2017-317077supp001.pdf [file jnnp-2017-317077supp001.pdf]

## Supplemental content

### Methods

#### *PRO-ACT dataset*

Our second validation cohort consisted of PRO-ACT data (version Dec. 2015). Within PRO-ACT, plasma creatinine values are given in  $\mu\text{mol/L}$ ; plasma creatinine values measured originally in  $\text{mg/dL}$  were transformed by multiplying the values by 88.4. As we showed in the EMPOWER study (**eFigure 1**), these transformations affect the variability due to differences in precision. More importantly, the transformations gave rise to odd longitudinal patterns (i.e. repeating 88.4  $\mu\text{mol/L}$  over an entire 12-month period); it is highly unlikely that these reflect the true biological variation. Therefore, all patients with transformed values from  $\text{mg/dL}$  to  $\mu\text{mol/L}$  were identified and excluded. Additionally, for some patients, a last-observation-carried-forward (LOCF) procedure was performed to account for missing data. As LOCF procedures may bias the estimates, and linear mixed models are flexible in handling missing data, the LOCF procedure was reversed and we removed all imputed values. Finally, we matched each plasma creatinine measurement with an ALSFRS-R score as described in the methods section. Because we found strong evidence that the power of plasma creatinine is severely affected by the sampling interval (i.e. monthly vs bimonthly sampling, figure 2), only patients with at least one measurement per 1.15 month (calculated as observed time divided by number of observations) were included in the analysis. A value of 1.15 was chosen to allow for missing data (1.15 corresponds to approximately 2 missing data points for 12 months' follow-up data or 15% missing data). Finally, we merged the matched plasma creatinine and ALSFRS-R scores with baseline characteristics and survival data. If no survival data were available, subjects were censored after their last known follow-up visit.

**eFigure 1 title.** Differences between measurement scales in the longitudinal variability of plasma creatinine.

**eFigure 1 legend.** Raw plasma creatinine levels are shown for different follow-up visits during a 12-month period in the EMPOWER study. Plasma creatinine levels, originally determined in milligrams per deciliter, were multiplied by 88.4 to transform the scale to micromoles per liter. As can be seen, original measurements in milligrams per deciliter show considerably less variability between scores and result in a large step size (step size of 8.84 vs step size of 1 for  $\mu\text{mol/L}$ ). Looking at the medians over time (horizontal black lines in the boxplots), this may severely affect the ability of plasma creatinine to detect disease progression.

**eTable 1.** Variability and longitudinal patterns of the ALSFRS-R and plasma creatinine.

|                                                | <b>ALSFRS-R<sup>a</sup></b> | <b>Plasma creatinine<sup>a</sup></b> |
|------------------------------------------------|-----------------------------|--------------------------------------|
| <b>LITRA</b> (n = 50, $\mu\text{mol/L}$ )      |                             |                                      |
| Between-patient variability at baseline        | 0.59 (CI: 0.47 – 0.74)      | 0.78 (CI: 0.63 – 0.97)               |
| Average slope                                  | -0.11 (CI: -0.13 – -0.09)   | -0.07 (CI: -0.09 – -0.06)            |
| Between-patient slope variability              | 0.06 (CI: 0.04 – 0.08)      | 0.03 (CI: 0.02 – 0.04)               |
| Within-patient variability                     | 0.27 (CI: 0.24 – 0.31)      | 0.36 (CI: 0.32 – 0.40)               |
| <b>EMPOWER I</b> (n = 449, $\mu\text{mol/L}$ ) |                             |                                      |
| Between-patient variability at baseline        | 0.63 (CI: 0.59 – 0.67)      | 0.85 (CI: 0.63 – 0.97)               |
| Average slope                                  | -0.13 (CI: -0.14 – -0.12)   | -0.07 (CI: -0.09 – -0.06)            |
| Between-patient slope variability              | 0.09 (CI: 0.09 – 0.10)      | 0.05 (CI: 0.02 – 0.04)               |
| Within-patient variability                     | 0.24 (CI: 0.23 – 0.24)      | 0.39 (CI: 0.38 – 0.40)               |
| <b>EMPOWER II</b> (n = 487, $\text{mg/dL}$ )   |                             |                                      |
| Between-patient variability at baseline        | 0.67 (CI: 0.63 – 0.72)      | 0.82 (CI: 0.69 – 1.21)               |
| Average slope                                  | -0.13 (CI: -0.14 – -0.12)   | -0.06 (CI: -0.07 – -0.06)            |
| Between-patient slope variability              | 0.09 (CI: 0.08 – 0.10)      | 0.05 (CI: 0.04 – 0.08)               |
| Within-patient variability                     | 0.24 (CI: 0.24 – 0.25)      | 0.39 (CI: 0.38 – 0.40)               |
| <b>PRO-ACT</b> (n = 255, $\mu\text{mol/L}$ )   |                             |                                      |
| Between-patient variability at baseline        | 0.63 (CI: 0.57 – 0.69)      | 0.82 (CI: 0.75 – 0.89)               |
| Average slope                                  | -0.14 (CI: -0.16 – -0.13)   | -0.07 (CI: -0.07 – -0.06)            |
| Between-patient slope variability              | 0.11 (CI: 0.10 – 0.13)      | 0.04 (CI: 0.04 – 0.05)               |
| Within-patient variability                     | 0.24 (CI: 0.23 – 0.25)      | 0.40 (CI: 0.39 – 0.41)               |
| <b>COMBINED</b> (n = 754, $\mu\text{mol/L}$ )  |                             |                                      |
| Between-patient variability at baseline        | 0.62 (CI: 0.59 – 0.66)      | 0.83 (CI: 0.79 – 0.88)               |

|                                   |                           |                           |
|-----------------------------------|---------------------------|---------------------------|
| Average slope                     | -0.13 (CI: -0.14 – -0.12) | -0.07 (CI: -0.07 – -0.06) |
| Between-patient slope variability | 0.10 (CI: 0.09 – 0.10)    | 0.04 (CI: 0.04 – 0.05)    |
| Within-patient variability        | 0.24 (CI: 0.24 – 0.24)    | 0.39 (CI: 0.38 – 0.40)    |

Abbreviations: ALSFRS-R = ALS Functional Rating Scale-revised; CI = 95% confidence

interval; Between-patient variability at baseline = random effects standard deviation

intercepts; Between-patient slope variability = random effects standard deviation slopes;

Within-patient variability = standard deviation residual variance.

<sup>a</sup> Scores were standardized to directly compare the ALSFRS-R total score and plasma creatinine level.

<sup>b</sup> P-values are based on the likelihood ratio test, calculated by merging all outcome data (ALSFRS-R and plasma creatinine data) together and specifying an uncorrelated random effects hierarchy.

**eTable 2.** Final multivariate Cox PH model after backward stepwise selection.

|                                           | Hazard Ratio | 95% CI      | P-value |
|-------------------------------------------|--------------|-------------|---------|
| Age, y                                    | 1.05         | 1.03 – 1.06 | < 0.001 |
| Gender, <i>ref = female</i>               | 2.06         | 1.51 – 2.82 | < 0.001 |
| Site of onset, <i>ref = bulbar</i>        | 0.72         | 0.54 – 0.97 | 0.029   |
| $\Delta$ FRS, mo <sup>a</sup>             | 0.15         | 0.08 – 0.29 | < 0.001 |
| Baseline FVC (% predicted)                | 0.98         | 0.97 – 0.98 | < 0.001 |
| Baseline plasma creatinine ( $\mu$ mol/L) | 0.98         | 0.97 – 0.99 | < 0.001 |

95% CI = 95% confidence interval; FVC% = forced vital capacity; <sup>a</sup> $\Delta$ FRS = exponent

[(ALSFRS-R score at inclusion – 48) / disease duration from symptom onset]; Ref =

reference category
